# Supplementary material for: Identification of QTLs for rice grain size and weight by high-throughput SNP markers in the IR64 x Sadri population
Source: Front Genet. 2022 Aug 19;13:955347. doi: 10.3389/fgene.2022.955347 (PMC9437704; doi:10.3389/fgene.2022.955347)
Supplement: Supplementary file 1 [file Table1.XLSX]

## Sheet: SNP data
SNP_Sample_ids	Alt_ID	F	Sample_Group	id6004481	id3017266	id1028304	ud10000620	wd8004122	id11011505	id11003281	fd13	id11003556	id2010969	fd10	id3015399	id9002497	id7000461	id5002987	id6003318	id2004774	id7000157	id5008572	id6006147	id1020667	id2011968	id3000913	id10000644	id11004240	id3007109	id7001156	id1001073	id3011383	id11000133	id1012048	wd2000409	id9000389	id2003094	id11008929	wd5001329	id11008862	id12006801	id11000980	id1004256	id1023892	id12000252	id10002602	id9002563	id2015767	id8004029
CK0162014-VBP_R001_C001	Sample1	0	Kashif	A	A	A/G	A	A	A/T	A/C	A	A/G	A	T	A	G	A	G	A	G	A	A/G	T	A	C	A/G	A	G	A	A	A/G	A	A	G	A/G	A/T	A/G	A/C	G	A/C	A/G	A	A/G	G	A	G	G	A	A
CK0162014-VBP_R002_C001	Sample13	0	Kashif	A/G	A	.	A/G	A	A	A/C	A	.	A/C	T	A	G	A/G	G	A	G	.	A/G	T	A	C	G	A	G	A	A	A/G	A	A/C	.	G	A	A/G	C	G	A	.	A	A	A/G	A/T	C/G	G	G	A/G
CK0162014-VBP_R003_C001	Sample25	0	Kashif	A/G	A	A/G	A/G	A	A/T	A/C	A	A/G	A/C	T	A	G	.	G	A	G	A	A/G	T	G	C	G	A	G	A/G	A/C	A/G	A	A/C	A/G	G	A/T	A/G	A/C	G	A/C	A/G	A	A/G	A/G	A	C/G	G	A/G	A
CK0162014-VBP_R004_C001	Sample37	0	Kashif	A/G	A	A/G	A	A	A	A/C	A	A/G	A	T	A	G	A/G	G	A/T	G	A	A/G	T	A/G	C	G	A	G	A	A/C	A	A	A/C	A/G	G	A	G	C	G	A	A	A	A	A	T	G	G	A/G	G
CK0162014-VBP_R005_C001	Sample49	0	Kashif	A/G	A	A/G	A	A	A	A/C	A	A/G	C	T	A	G	A	G	A	G	A	A/G	T	A	C	A/G	A	G	A	A/C	A/G	A	A/C	A/G	A	A/T	A	C	G	A	A/G	A	A/G	A/G	A/T	G	G	A/G	G
CK0162014-VBP_R006_C001	Sample61	0	Kashif	A	A	A/G	A/G	A	A/T	C	A	G	A	T	A	G	A	G	A	G	A	A/G	T	A/G	C	A/G	A	G	A	A	G	A	C	A/G	A/G	A/T	A/G	A	G	C	A/G	A	G	A/G	.	C/G	G	A	A
CK0162014-VBP_R007_C001	Sample73	0	Kashif	A/G	A	A/G	G	A	T	A/C	A	A/G	A/C	T	A	G	A	G	A	G	A	A/G	T	A	C	A/G	A	G	A/G	A/C	A	A	A	A	G	A/T	G	A	G	C	A/G	.	A	A/G	A/T	C	G	G	A
CK0162014-VBP_R008_C001	Sample85	0	Kashif	A/G	A	A/G	A/G	A	A/T	A	A	A	C	T	A	G	A/G	G	A	G	A	A	T	A/G	C	G	A	G	A/G	A	A/G	A	C	A/G	G	T	G	A/C	G	A/C	A/G	.	G	A/G	A/T	C/G	G	G	G
CK0162014-VBP_R001_C002	Sample2	0	Kashif	A	A/G	G	A/G	A	A	C	A/G	A/G	A/C	T	A	G	A/G	G	A/T	G	A	A	T	.	C	A/G	A/T	G	A/G	C	G	A/C	A/C	G	G	A	G	A/C	G	A/C	A	A	A/G	A/G	A/T	C/G	G	A/G	G
CK0162014-VBP_R002_C002	Sample14	0	Kashif	A/G	A	A/G	A/G	A	T	A	A	A	A/C	T	A	G	.	G	A	G	A	A/G	T	A/G	C	A/G	A	G	A	A	A/G	A	A/C	A	A/G	A/T	A/G	A/C	G	A/C	A/G	A	G	A	A	C/G	G	G	G
CK0162014-VBP_R003_C002	Sample26	0	Kashif	G	A	A/G	A/G	A	T	A/C	A	A/G	A/C	T	A	G	G	G	A	G	A	G	T	A	C	A/G	A	G	A	C	A/G	A	A	G	A/G	T	A/G	A	G	C	A/G	.	A/G	G	A	C/G	G	A/G	G
CK0162014-VBP_R004_C002	Sample38	0	Kashif	G	A	G	G	A	A/T	A	A	A	A	T	A	G	A	G	A	G	A	G	T	A/G	C	A/G	A	G	A	A	A/G	A	A/C	A/G	A/G	A/T	A/G	A/C	G	A/C	A/G	A	A/G	A/G	A/T	C	G	A/G	A/G
CK0162014-VBP_R005_C002	Sample50	0	Kashif	A/G	A	A/G	A/G	A	A/T	A/C	A	A/G	C	T	A	G	A	G	A	G	A	A/G	T	A/G	C	G	A	G	A	A	A/G	A	A	A/G	G	T	G	A/C	G	A/C	G	.	A/G	A/G	T	C/G	G	G	A/G
CK0162014-VBP_R006_C002	Sample62	0	Kashif	A/G	A	A	A/G	A	T	A/C	A	A/G	A/C	T	A	G	A	G	A	G	A	G	T	G	C	G	A	G	A/G	A/C	A/G	A	C	A/G	G	A/T	G	A	G	C	A/G	A	A	A/G	A/T	C/G	G	G	A/G
CK0162014-VBP_R007_C002	Sample74	0	Kashif	A	A	A/G	A	A	T	A/C	A	A/G	C	T	A	G	A/G	G	A	G	A	A/G	T	A/G	C	A/G	A	G	A	A	G	A	A	G	A/G	A/T	A/G	A	G	C	A	.	A	A/G	A/T	G	G	A/G	G
CK0162014-VBP_R008_C002	Sample86	0	Kashif	A/G	A	G	G	A	A	A/C	A	A/G	A/C	T	A	G	G	G	A	G	A	A/G	T	G	C	G	A	G	A	C	A/G	A	A/C	A	G	T	A/G	A/C	G	A/C	A/G	A	A/G	A	T	C	G	A/G	A/G
CK0162014-VBP_R001_C003	Sample3	0	Kashif	A/G	A/G	A/G	A/G	A	A	A/C	A	A/G	A/C	T	A	G	A/G	G	A/T	A/G	A	G	T	A	C	A/G	A	G	A/G	C	A/G	A/C	A/C	A/G	A/G	A/T	A	A/C	G	A/C	A	A	A/G	G	A	C/G	G	A	A/G
CK0162014-VBP_R002_C003	Sample15	0	Kashif	A	A	A/G	A/G	A	T	A/C	A	A/G	A/C	T	A	G	A	G	A	G	A	A/G	T	A/G	C	G	A	G	G	A	A	A	A	A	G	A/T	A	A	G	C	A	A	A	A/G	A/T	C/G	G	A	A/G
CK0162014-VBP_R003_C003	Sample27	0	Kashif	A/G	A	A/G	A	A	A	C	A	A/G	C	T	A	G	A	G	A	G	A	A	T	G	C	A/G	A/T	G	A/G	A	G	A	A	G	A/G	A	A/G	A/C	G	A/C	G	.	A	A	A/T	C/G	G	A	G
CK0162014-VBP_R004_C003	Sample39	0	Kashif	A/G	A	A	G	A	A/T	A	A	A	A	T	A	G	A/G	G	A	G	A	A	T	A/G	C	A	A	G	.	A/C	A	A	A/C	A	A/G	A/T	A	A/C	G	A/C	A/G	A	A	G	A/T	C	G	A	A/G
CK0162014-VBP_R005_C003	Sample51	0	Kashif	A	A	A/G	A/G	A	A/T	A/C	A/G	A/G	C	T	A	G	.	G	A/T	A/G	T	A/G	T	A/G	C	A/G	A	A/G	A	A/C	G	A/C	A	G	G	A	A/G	C	G	A	A/G	.	A/G	G	A/T	C/G	G	A/G	A/G
CK0162014-VBP_R006_C003	Sample63	0	Kashif	G	A	G	A	A	A/T	A/C	A	A/G	C	T	A	G	A	G	A	G	A	A/G	T	A/G	C	G	A	G	A/G	A	G	A	A	A/G	G	A/T	G	A/C	G	A/C	G	.	A/G	A	T	G	G	G	A
CK0162014-VBP_R007_C003	Sample75	0	Kashif	A/G	A/G	A/G	A/G	A	.	A/C	A	A/G	A/C	T	A	G	A/G	G	A/T	G	T	A/G	T	A/G	C	A	A/T	G	G	C	G	A/C	A/C	A	A/G	A	A	A/C	G	A/C	A	A	G	A/G	A/T	C/G	G	A/G	A/G
CK0162014-VBP_R008_C003	Sample87	0	Kashif	A/G	A	A	A/G	A	A	A/C	A	A/G	A/C	T	A	G	A/G	G	A	G	A	G	T	A	C	G	A	G	A/G	A/C	G	A	A/C	A	A/G	T	A/G	A/C	G	A/C	G	A	G	G	T	C/G	G	A/G	G
CK0162014-VBP_R001_C004	Sample4	0	Kashif	A/G	A	A	A	A	A	A	A	A	A	T	A	G	A/G	G	A	G	A	A/G	T	A/G	C	G	A	G	A	A	A	A	.	A/G	G	A/T	G	C	G	A	G	.	A/G	A/G	A	G	G	A	A/G
CK0162014-VBP_R002_C004	Sample16	0	Kashif	A	A	A	A	A	A/T	A/C	A	A/G	A/C	T	A	G	A	G	A	G	A	A	T	A/G	C	A/G	A	G	A/G	A	A	A	C	A	A/G	A/T	A/G	A/C	G	A/C	A	A	G	A/G	T	G	G	A/G	A/G
CK0162014-VBP_R003_C004	Sample28	0	Kashif	A	A	A/G	A/G	A	T	A	A	A	C	T	A	G	.	G	A	G	.	A/G	T	A/G	C	A/G	A	G	A/G	A	A/G	A	A/C	A/G	G	A/T	G	A	G	C	A	.	A/G	A/G	A/T	C/G	G	G	A/G
CK0162014-VBP_R004_C004	Sample40	0	Kashif	A/G	A	A	A/G	A	A/T	C	A	G	A/C	T	A	G	A	G	A	G	A	A	T	A/G	C	A/G	A	G	A/G	A	A/G	A	C	A/G	A	A	A	C	G	A	A/G	A	A/G	A/G	T	C/G	G	G	A
CK0162014-VBP_R005_C004	Sample52	0	Kashif	A/G	A	A/G	A	A	T	A/C	A	A/G	A	T	A	G	A	G	A	G	A	A	T	G	C	A/G	A	G	A	A	A/G	A	C	A/G	A	A/T	A	A	G	C	A/G	A	A/G	A	A/T	G	G	A/G	G
CK0162014-VBP_R006_C004	Sample64	0	Kashif	A/G	A	A	A	A	A	C	A	G	A/C	T	A	G	A/G	G	A	G	A	A/G	T	A/G	C	G	A	G	A	A	A	A	A/C	A	G	A/T	A/G	C	G	A	G	A	.	A	A	G	G	G	A/G
CK0162014-VBP_R007_C004	Sample76	0	Kashif	A/G	A	G	A/G	A	A	A	A	A	A/C	T	A	G	A	G	A	G	A	A	T	A/G	C	A/G	A	G	A	A	A	A	A/C	A	A/G	A	A/G	C	G	A	G	.	A/G	A/G	T	C/G	G	G	A/G
CK0162014-VBP_R008_C004	Sample88	0	Kashif	A/G	A	A/G	A	A	T	C	A	G	A	T	A	G	A/G	G	A	G	A	A/G	T	A/G	C	G	A	G	A	A/C	A/G	A	A/C	A/G	G	A/T	A	A	G	C	A/G	A	A/G	A/G	A/T	G	G	A/G	A/G
CK0162014-VBP_R001_C005	Sample5	0	Kashif	A/G	A	G	A/G	A	A/T	A	A	A	A/C	T	A	G	A/G	G	A	G	A	A	T	A/G	C	A	A	G	A	A	A	A	A/C	A/G	G	A/T	A/G	C	G	A	A	A	A	A	A/T	C/G	G	A/G	A/G
CK0162014-VBP_R002_C005	Sample17	0	Kashif	A	A	A/G	G	A	A	A	A	A	A	T	A	G	A	G	A	G	A	A/G	T	A	C	G	A	G	G	A	A/G	A	A/C	A	G	A	A	A/C	G	A/C	A/G	A	G	G	T	C	G	A	A/G
CK0162014-VBP_R003_C005	Sample29	0	Kashif	A/G	A	A/G	A/G	A	A/T	A/C	A	A/G	A/C	T	A	G	G	G	A	G	A	A/G	T	A/G	C	A/G	A	G	A	A/C	A/G	A	C	A	G	A/T	A/G	A/C	G	A/C	G	A	G	A	A	C/G	G	A	G
CK0162014-VBP_R004_C005	Sample41	0	Kashif	A/G	A	A	A/G	A	A/T	C	A	G	A/C	T	A	G	A	G	A	G	A	A	T	A/G	C	A/G	A	G	A/G	A	A/G	A	C	A/G	A	A	A	C	G	A	A/G	A	A/G	A/G	T	C/G	G	G	A
CK0162014-VBP_R005_C005	Sample53	0	Kashif	A	A	A/G	A/G	A	T	C	A	G	A	T	A	G	A	G	A	G	A	A/G	T	A	C	A/G	A	G	A	A	A/G	A	A	A/G	A/G	T	A/G	A	G	C	A/G	A	G	A/G	T	C/G	G	A/G	A/G
CK0162014-VBP_R006_C005	Sample65	0	Kashif	G	A	A/G	A	A	A/T	A/C	A	A/G	A	T	A	G	A	G	A	G	A	A	T	G	C	A/G	A	G	A/G	A	A	A	A	A/G	A/G	A/T	A	A/C	G	A/C	A	A	A	A	A	G	G	A/G	A
CK0162014-VBP_R007_C005	Sample77	0	Kashif	A/G	A	A/G	A/G	A	A/T	A	A	A	A	T	A	G	A/G	G	A	G	A	A/G	T	A	C	G	A	G	A/G	A/C	A/G	A	A	A/G	G	A/T	A/G	C	G	A	A	.	A	A/G	A/T	C/G	G	A	A/G
CK0162014-VBP_R008_C005	Sample89	0	Kashif	A	A	G	G	A	A/T	A/C	A	A/G	A/C	T	A	G	A/G	G	A	G	A	A/G	T	A/G	C	G	A	G	G	A/C	A/G	A	A	A	A	A/T	A/G	A/C	G	A/C	G	A	A/G	A	A	C	G	A/G	A/G
CK0162014-VBP_R001_C006	Sample6	0	Kashif	A	A	A/G	A	A	A/T	A	A	A	A/C	T	A	G	A	G	A	G	A	A/G	T	A/G	C	A/G	A	G	A	A	G	A	A	A/G	A	A/T	A/G	A/C	G	A/C	A	.	G	A/G	T	G	G	A/G	G
CK0162014-VBP_R002_C006	Sample18	0	Kashif	G	A	A/G	A	A	T	A	A	A	A/C	T	A	G	A/G	G	A	G	A	G	T	G	C	A/G	A	G	A/G	A/C	A/G	A	A/C	A/G	G	A/T	G	C	G	A	G	.	A/G	A/G	A/T	G	G	A	A/G
CK0162014-VBP_R003_C006	Sample30	0	Kashif	A	A	G	A	A	A/T	A/C	A	A/G	C	T	A	G	A/G	G	A	G	A	A/G	T	A/G	C	A	A	G	A/G	A	A/G	A	A/C	G	A/G	A/T	A/G	A/C	G	A/C	G	A	A/G	A/G	A/T	G	G	A/G	G
CK0162014-VBP_R004_C006	Sample42	0	Kashif	A/G	A	A/G	A	A	A	A/C	A	A/G	A/C	T	A	G	A	G	A	G	A	A	T	G	C	G	A	G	G	A/C	G	A	A	A/G	G	A/T	A	C	G	A	A/G	A	G	A	A/T	G	G	A	A
CK0162014-VBP_R005_C006	Sample54	0	Kashif	A	A/G	A/G	G	A	A/T	A/C	A	A/G	A	T	A	G	A/G	G	A/T	G	T	A/G	T	A	C	A/G	A/T	A/G	A/G	C	G	A/C	A	A	G	A/T	A/G	A/C	G	A/C	A/G	.	A/G	A/G	A/T	C	G	A	A/G
CK0162014-VBP_R006_C006	Sample66	0	Kashif	G	A	A/G	A/G	A	A/T	A/C	A	A/G	A/C	T	A	G	A/G	G	A	G	A	A/G	T	A/G	C	G	A	G	A	A/C	A/G	A	A/C	A	A/G	T	A/G	A	G	C	G	A	G	A/G	T	C/G	G	A/G	A
CK0162014-VBP_R007_C006	Sample78	0	Kashif	G	A	A/G	A/G	A	A/T	A/C	A	A/G	A/C	T	A	G	A	G	A	G	A	G	T	A/G	C	G	A	G	A	A	A/G	A	A/C	A/G	G	T	A/G	A/C	G	A/C	G	A	A/G	A/G	T	C/G	G	A	G
CK0162014-VBP_R008_C006	Sample90	0	Kashif	A/G	A	A/G	A/G	A	A/T	A/C	A	A/G	A/C	T	A	G	A	G	A	G	A	G	T	A/G	C	A	A	G	A	A/C	A/G	A	A/C	A	G	A/T	G	A	G	C	G	A	G	A/G	A/T	C/G	G	A	A
CK0162014-VBP_R001_C007	Sample7	0	Kashif	A	A	G	G	A	T	A	A	A	A/C	T	A	G	.	G	A	G	.	A/G	T	A/G	C	G	A	G	A	A	A/G	A	A/C	A/G	.	A/T	G	A/C	G	A/C	A/G	.	.	A/G	T	C	G	A/G	G
CK0162014-VBP_R002_C007	Sample19	0	Kashif	A	A	G	A	A	T	A/C	A	A/G	C	T	A	G	G	G	A	G	A	A/G	T	A/G	C	A/G	A	G	A/G	A/C	A/G	A	A/C	A/G	A	T	A	A	G	C	A/G	A	A/G	A/G	T	G	G	A	A/G
CK0162014-VBP_R003_C007	Sample31	0	Kashif	A	A	A/G	A	A	A/T	A/C	A	A/G	A/C	T	A	G	A/G	G	A	G	A	A	T	A	C	G	A	G	A	A	A/G	A	A	A/G	G	A/T	A/G	A/C	G	A/C	A	A	A/G	G	A	G	G	A/G	A/G
CK0162014-VBP_R004_C007	Sample43	0	Kashif	G	A	G	A	A	A/T	A	A	A	A/C	T	A	G	A/G	G	A	G	A	G	T	G	C	G	A	G	A	A	A	A	A	A/G	G	T	A/G	A/C	G	A/C	G	.	A	A	T	G	G	A/G	A/G
CK0162014-VBP_R005_C007	Sample55	0	Kashif	A/G	A	G	G	A	A/T	A/C	A	A/G	A	T	A	G	A	G	A	G	A	A/G	T	A	C	A	A	G	A	A	A/G	A	A	A	G	A/T	A/G	A/C	G	A/C	A/G	.	G	G	A/T	C	G	A/G	G
CK0162014-VBP_R006_C007	Sample67	0	Kashif	A	A	A/G	A/G	A	A/T	A/C	A	A	A	T	A	G	A	G	A	G	A	A	T	G	C	A/G	A	G	A/G	A	G	A	A	G	G	A	A/G	C	G	A	A/G	.	.	A	A/T	C/G	G	A	G
CK0162014-VBP_R007_C007	Sample79	0	Kashif	A/G	A	G	A	A	A/T	A/C	A	A/G	A/C	T	A	G	A	G	A	G	A	G	T	A/G	C	A/G	A	G	A	.	G	A	A	A/G	A/G	T	G	A/C	G	A/C	G	.	G	A/G	T	G	G	A	A
CK0162014-VBP_R008_C007	Sadri	0.95	Kashif	G	A	A	G	A	T	C	A	G	A	T	A	G	G	G	A	G	A	G	T	A	C	A	A	G	G	C	G	A	C	A	A	T	A	A	G	C	A	A	G	G	A	C	G	A	A
CK0162014-VBP_R001_C008	Sample8	0	Kashif	A/G	A	A	A/G	A	.	A	A	A	A/C	T	A	G	A	G	A	G	A	A/G	T	A/G	C	G	A	G	A/G	A	A/G	A	C	G	G	A/T	G	C	G	A	.	A	A/G	A/G	A	C/G	G	G	A/G
CK0162014-VBP_R002_C008	Sample20	0	Kashif	A	A	A/G	G	A	A/T	A	A	A	A/C	T	A	G	A	G	A	G	A	A/G	T	A/G	C	G	A	G	A/G	A/C	A/G	A	A	A	G	A	A/G	A/C	G	A/C	A	.	A/G	A/G	A/T	C	G	A/G	A/G
CK0162014-VBP_R003_C008	Sample32	0	Kashif	A	A	A/G	A	A	A/T	A/C	A	A/G	A/C	T	A	G	A/G	G	A	G	A	A/G	T	G	C	A/G	A	G	G	A/C	A	A	A/C	G	A	A/T	A	A/C	G	A/C	.	A	A	A	T	G	G	A/G	A/G
CK0162014-VBP_R004_C008	Sample44	0	Kashif	A/G	A	G	A/G	A	T	A/C	A	A/G	A/C	T	A	G	A/G	G	A	G	A	G	T	A/G	C	A/G	A	G	A/G	A	A/G	A	A/C	A/G	A	T	A	A	G	C	A	A	A	A	A/T	C/G	G	A/G	A/G
CK0162014-VBP_R005_C008	Sample56	0	Kashif	A/G	A	A/G	A/G	A	A	C	A	G	A/C	T	A	G	A/G	G	A	G	A	G	T	G	C	A	A	G	A	.	G	A	C	A	A	T	A	A	G	C	A/G	A	A/G	A/G	A/T	C/G	G	A/G	A/G
CK0162014-VBP_R006_C008	Sample68	0	Kashif	A/G	A	G	A	A	T	A/C	A	A/G	C	T	A	G	A/G	G	A	G	A	A	T	A/G	C	A/G	A	G	A	C	A	A	A	A/G	G	T	G	A/C	G	A/C	A/G	.	A	A/G	T	G	G	A	A
CK0162014-VBP_R007_C008	Sample80	0	Kashif	A/G	A	A/G	G	A	A/T	C	A/G	G	A/C	T	A	G	A/G	G	A/T	A/G	A	A/G	T	A/G	C	A	A	A/G	A	C	G	A/C	A/C	.	A/G	A	A/G	C	G	A	A	.	G	G	A/T	C	G	A	A/G
CK0162014-VBP_R008_C008	IR64	0.95	Kashif	A	A	G	A	A	A	A	A	A	C	T	A	G	A	G	A	G	A	A	T	G	C	G	A	G	A	A	A	A	A	G	G	A	G	C	G	A	G	.	A	A	T	G	G	G	G
CK0162014-VBP_R001_C009	Sample9	0	Kashif	A/G	A	A/G	A	A	A/T	A	A	A	A/C	T	A	G	A/G	G	A	G	A	A	T	G	C	G	A	G	A/G	C	A/G	A	A	A	G	A/T	A/G	C	G	A	A/G	.	A/G	A	T	G	G	A/G	A
CK0162014-VBP_R002_C009	Sample21	0	Kashif	A/G	A	A/G	A/G	A	A	A/C	A	A/G	A/C	T	A	G	A	G	A	G	A	A/G	T	A/G	C	G	A	G	A/G	A	A	A	A/C	A/G	A/G	A/T	G	C	G	A	G	A	A	A/G	A/T	C/G	G	A/G	A/G
CK0162014-VBP_R003_C009	Sample33	0	Kashif	G	A	A/G	A	A	A	A/C	A	A	A/C	T	A	G	A	G	A	G	A	A	T	A/G	C	A/G	A	G	A/G	A/C	G	A	A/C	A/G	G	T	G	C	G	A	.	A	G	A/G	T	G	G	A	A/G
CK0162014-VBP_R004_C009	Sample45	0	Kashif	A/G	A	A/G	A/G	A	A/T	A	A	A	A/C	T	A	G	A/G	G	A	G	A	G	T	A/G	C	G	A	G	A	A/C	A/G	A	A	A	A/G	A/T	G	C	G	A	A	.	A/G	A/G	A	C/G	G	A	A
CK0162014-VBP_R005_C009	Sample57	0	Kashif	G	A	A/G	A/G	A	A/T	A/C	A	A/G	A/C	T	A	G	.	G	A	G	A	A/G	T	A	C	A	A	G	A/G	A/C	G	A	A/C	A	A	T	A	A/C	G	A/C	.	A	.	A/G	A	C/G	G	.	A
CK0162014-VBP_R006_C009	Sample69	0	Kashif	A	A	A	A/G	A	A/T	A	A	A	A	T	A	G	A	G	A	G	A	A/G	T	A	C	G	A	G	A/G	A/C	G	A	C	A	A/G	A/T	A	C	G	A	A/G	.	G	G	A/T	C/G	G	A	G
CK0162014-VBP_R007_C009	Sample81	0	Kashif	A/G	A	A/G	G	A	A	C	A/G	G	A	T	A	G	A	G	A/T	G	A	A/G	T	A/G	C	A/G	T	A/G	A	C	G	A/C	C	A/G	A/G	A/T	A/G	A	G	A/C	A	A	A	G	A/T	C	G	A	A/G
CK0162014-VBP_R001_C010	Sample10	0	Kashif	A/G	A	A	A/G	A	.	A	A	A	A/C	T	A	G	A/G	G	A	G	A	A	T	A/G	C	G	A	G	A	C	A	A	A	G	G	A/T	A	C	G	A	A/G	.	A	G	A/T	C/G	G	A/G	A/G
CK0162014-VBP_R002_C010	Sample22	0	Kashif	A/G	A	A/G	A/G	A	T	A/C	A	A/G	A/C	T	A	G	A/G	G	A	G	A	A	T	G	C	G	A	G	A/G	A/C	A	A	A	A/G	G	T	A	A/C	G	A/C	.	.	A/G	A	A/T	C/G	G	A/G	A/G
CK0162014-VBP_R003_C010	Sample34	0	Kashif	A/G	A	A/G	A	A	A/T	A/C	A	A/G	A/C	T	A	G	A/G	G	A	G	A	A/G	T	A/G	C	A/G	A	G	A	A/C	A/G	A	A	A/G	G	T	G	C	G	A	A/G	.	A/G	A/G	T	G	G	A/G	A
CK0162014-VBP_R004_C010	Sample46	0	Kashif	A/G	A	G	A/G	A	A	A/C	A	A/G	A/C	T	A	G	.	G	A	G	A	A	T	G	C	A/G	A	G	A/G	A	A/G	A	A/C	A/G	G	A	G	A/C	G	A/C	A/G	A	A/G	A	A/T	C/G	G	A	G
CK0162014-VBP_R005_C010	Sample58	0	Kashif	G	A	A/G	A/G	A	.	A	A	A	C	T	A	G	A	G	A	G	A	A/G	T	A/G	C	G	A	G	A	A	A	A	A	A	G	A/T	A/G	C	G	A	A	.	A	A/G	A	C/G	G	A	A/G
CK0162014-VBP_R006_C010	Sample70	0	Kashif	A/G	A	A/G	A/G	A	A/T	A/C	A	A/G	A	T	A	G	A	G	A	G	A	A/G	T	A/G	C	A/G	A	G	A	A/C	A/G	A	A/C	A/G	A/G	A	G	A/C	G	A/C	A/G	.	A/G	A/G	A/T	C/G	G	A	A
CK0162014-VBP_R007_C010	Sample82	0	Kashif	A/G	A/G	A	A/G	A	A	A/C	A	A/G	A	T	A	G	A/G	G	A/T	G	A	A/G	T	A/G	C	A/G	A/T	G	A/G	A/C	G	A/C	A	A/G	G	A/T	G	C	G	A	.	.	A/G	A	A/T	C	G	A	A/G
CK0162014-VBP_R001_C011	Sample11	0	Kashif	A/G	A	G	A	A	A/T	A/C	A	A/G	A	T	A	G	A/G	G	A	G	A	A/G	T	G	C	G	A	G	A/G	C	A/G	A	A	A	G	T	A	C	G	A	A/G	A	A/G	A	A	G	G	A	A
CK0162014-VBP_R002_C011	Sample23	0	Kashif	A/G	A	A/G	A	A	A/T	C	A	A/G	A/C	T	A	G	A	G	A	G	A	A	T	A	C	A	A	G	A	A	G	A/C	A	G	A/G	A	G	C	G	A	A	.	A/G	A/G	A/T	G	G	A	A/G
CK0162014-VBP_R003_C011	Sample35	0	Kashif	A/G	A	A	A	A	T	A	A	A	A/C	T	A	G	A/G	G	A	G	A	A/G	A/T	A/G	A/C	G	A	G	A	A	A/G	A	A/C	A/G	A/G	A/T	A/G	A/C	G	A/C	A	.	A/G	A/G	T	C/G	G	A	G
CK0162014-VBP_R004_C011	Sample47	0	Kashif	A/G	A	A/G	A/G	A	A	A/C	A	A/G	A/C	T	A	G	A	G	A	G	A	A/G	T	G	C	A	A	G	A/G	C	A	A	C	G	A/G	T	A	C	G	A	G	A	A	A	A/T	C/G	G	G	G
CK0162014-VBP_R005_C011	Sample59	0	Kashif	A/G	A	A/G	A	A	.	A/C	A	A/G	C	T	A	G	A	G	A	G	A	A	T	A/G	C	A	A	G	A/G	A	G	A	A	A/G	A	T	A	C	G	A	A/G	.	A/G	A	A/T	G	G	A/G	A/G
CK0162014-VBP_R006_C011	Sample71	0	Kashif	A/G	A	A	G	A	T	C	A	G	A/C	T	A	G	A/G	G	A	G	A	A/G	T	A	C	A	A	G	A/G	C	G	A	C	A	A/G	A/T	A/G	A	G	C	.	A	G	G	A/T	C	G	A/G	A
CK0162014-VBP_R007_C011	Sample83	0	Kashif	A	A	A/G	A/G	A	T	A	A	A	A/C	T	A	G	A	G	A	G	A	A/G	T	A	C	G	A	G	A/G	A/C	A/G	A	C	A	G	A	A/G	A/C	G	A/C	A/G	.	A/G	G	T	C/G	G	G	G
CK0162014-VBP_R001_C012	Sample12	0	Kashif	A/G	A	G	A/G	A	T	A/C	A	A/G	A/C	T	A	G	A/G	G	A	G	A	A	T	A/G	C	A/G	A	G	A/G	A	A	A	C	A	G	A/T	A/G	A/C	G	A/C	A	A	A	A/G	A/T	C/G	G	A	G
CK0162014-VBP_R002_C012	Sample24	0	Kashif	G	A	G	A/G	A	T	A/C	A	.	A/C	T	A	G	A/G	G	A	G	A	G	T	A/G	C	A/G	A	G	A	A/C	A/G	A	A	A/G	A/G	A/T	A/G	A/C	G	A/C	A	.	A/G	A/G	A/T	C/G	G	A/G	G
CK0162014-VBP_R003_C012	Sample36	0	Kashif	A/G	A	A	A/G	A	A/T	A	A	A	A	T	A	G	A/G	G	A	G	A	A	T	G	C	G	A	G	A	A	G	A	A	G	G	T	G	C	G	A	G	.	G	A/G	A/T	.	G	A	G
CK0162014-VBP_R004_C012	Sample48	0	Kashif	G	A	A/G	A	A	A/T	A/C	A	A/G	A/C	T	A	G	A	G	A	G	A	G	T	A	C	G	A	G	A	A/C	A	A	C	A	G	A/T	A/G	A/C	G	A/C	G	A	A	G	A/T	G	G	A/G	A/G
CK0162014-VBP_R005_C012	Sample60	0	Kashif	A	A	G	A/G	A	A/T	A	A	A	A/C	T	A	G	A	G	A	G	A	A	T	A/G	C	G	A	G	A	A	A/G	A	A/C	G	G	A/T	A/G	C	G	A	A/G	A	A	A	A/T	C/G	G	G	G
CK0162014-VBP_R006_C012	Sample72	0	Kashif	A	A	A	A/G	A	.	C	A	G	C	T	A	G	A	G	A	G	A	A	T	A	C	A/G	A	G	A/G	C	G	A	C	A	A	A/T	A	A/C	G	A/C	A	A	A/G	G	T	C/G	G	.	A/G
CK0162014-VBP_R007_C012	Sample84	0	Kashif	A/G	A	G	A	A	A/T	A	A	A	A	T	A	G	A	G	A	G	A	A/G	T	A/G	C	G	A	G	A/G	A/C	A	A	C	A	A	A/T	A	A/C	G	A	A/G	A	A	A/G	A/T	G	G	G	G
[truncated: 338 more columns]

## Sheet: SNP map
SNP marker_id	Chromosome	Position	A_allele	B_allele
id1000556	1	657891	A	G
id1001073	1	1174585	A	G
id1001821	1	2276961	A	G
id1002308	1	2899077	A	G
id1002899	1	3528691	A	G
id1003559	1	4259452	A	G
id1004256	1	5332883	A	G
id1004348	1	5481178	A	G
id1004817	1	6136459	A	G
id1006175	1	7853081	A	G
id1006871	1	9163488	A	G
id1007776	1	10852970	A	G
id1008267	1	11948647	A	C
id1008684	1	12869918	A	T
id1008821	1	13388584	C	G
id1009616	1	14592566	A	G
ud1000711	1	15765545	A	G
ud1000727	1	16115600	A	G
id1010526	1	18876608	A	T
id1010609	1	19112927	A	G
id1011535	1	20926545	A	G
id1012048	1	22678415	A	G
id1012481	1	23697789	A	G
id1012784	1	24199686	A	G
id1014176	1	25740414	A	C
id1014853	1	26554003	A	C
id1015258	1	27429180	A	G
id1015541	1	28456080	A	C
id1016436	1	29897866	A	T
id1016633	1	30161036	A	G
id1017885	1	31748624	A	G
id1018329	1	32218792	A	G
id1018601	1	32609016	A	C
id1019332	1	33587122	A	C
id1020667	1	34945306	A	G
id1020828	1	35170076	A	T
id1021920	1	36762713	A	C
id1022408	1	37298115	C	G
id1023158	1	38200705	A	G
id1023892	1	39545238	A	G
id1024836	1	40892571	C	G
id1024972	1	41123311	A	G
id1025983	1	42579266	C	G
id1027099	1	43751775	C	G
id1028304	1	44672286	A	G
id2000096	2	201495	A	T
id2001102	2	1288670	A	G
id2001565	2	2819093	A	G
id2001831	2	3230773	A	C
id2002229	2	4143587	A	C
id2003094	2	5910769	A	G
id2003646	2	7153862	A	G
wd2000409	2	8730698	A	G
id2004774	2	10037202	A	G
id2005263	2	11261223	A	G
id2005554	2	12350173	A	G
ud2000793	2	15435937	A	C
id2006486	2	16865582	A	C
id2006621	2	17283898	A	G
id2006996	2	18275942	A	G
id2007461	2	19558579	A	T
id2007526	2	20086878	A	G
id2008219	2	21754999	A	C
id2008501	2	22034318	A	G
ud2001262	2	22844882	A	G
id2008866	2	23192777	A	G
id2009319	2	24114162	A	G
id2010102	2	25026134	A	G
id2010969	2	26143344	A	C
id2011561	2	27238229	A	G
id2011968	2	28095704	A	C
id2012453	2	29536135	A	G
fd12	2	29782673	A	G
id2013007	2	30414334	A	G
id2013434	2	31232596	A	C
id2014034	2	32419188	A	G
id2014684	2	33969220	C	G
ud2002015	2	34931795	A	G
id2015361	2	35187128	A	G
id2015762	2	35752615	A	G
id2015767	2	35754957	A	G
id2016108	2	36137347	A	G
id3000111	3	392204	A	C
id3000362	3	700079	A	T
fd9	3	1249290	A	G
id3000913	3	1649106	A	G
id3001137	3	2045916	A	C
id3001992	3	3635979	C	G
id3002191	3	3983345	A	G
id3002377	3	4243509	C	G
id3003215	3	5479916	A	G
id3003535	3	6010792	A	C
id3004190	3	7899862	A	G
id3004633	3	8853918	A	G
id3005145	3	9964290	A	T
id3005216	3	10144407	A	G
id3005817	3	11167623	A	C
id3006510	3	12681689	A	G
id3006808	3	13276088	A	G
id3007109	3	14736658	A	G
id3007320	3	15154454	A	G
id3007932	3	16423662	A	G
id3200001	3	16688207	A	C
id3008333	3	17302647	A	G
id3008957	3	18843841	A	G
id3009116	3	19320570	A	G
id3009433	3	20622588	A	G
id3009824	3	21821785	A	G
id3010106	3	22411452	C	G
id3010345	3	23024725	C	G
id3010753	3	24574458	A	G
id3010875	3	25328030	A	G
id3011048	3	26279017	A	G
id3011383	3	27815121	A	C
dd3000535	3	28430736	A	G
id3013669	3	29882411	A	C
id3013765	3	30021901	A	G
id3014401	3	31154191	C	G
fd10	3	32363157	A	T
id3015399	3	32863879	A	G
id3015703	3	33514580	A	G
id3016429	3	34481716	A	G
id3016979	3	35460731	A	T
id3017266	3	35787457	A	G
id3017762	3	36487567	A	G
id3017899	3	36675087	A	C
id4000179	4	364148	A	G
id4000641	4	1040120	A	G
id4001113	4	2471749	A	G
id4001932	4	4563797	A	C
ud4000438	4	5805455	A	G
id4002562	4	6470963	A	G
id4002852	4	7420537	C	G
id4002913	4	8077530	A	G
id4003259	4	9990567	A	G
id4003727	4	11988384	A	G
id4003973	4	13511528	A	G
id4004493	4	16310796	A	C
id4005120	4	17690560	A	T
id4005423	4	18793628	A	G
id4005867	4	19953282	A	G
id4006135	4	20366329	A	G
id4007105	4	21838206	A	G
id4007444	4	22833825	A	G
id4007556	4	23206625	A	G
id4008092	4	24789033	A	T
id4008430	4	25643812	A	G
id4008522	4	26095315	A	T
id4009024	4	27939492	A	C
id4009293	4	28610743	A	G
id4010238	4	30792292	A	G
id4010621	4	31772009	C	G
id4010924	4	32303312	A	G
id4011016	4	32537607	A	C
id4011562	4	33585440	A	G
id4011774	4	34266596	A	G
id4012434	4	35742807	A	G
id5000015	5	22690	C	G
id5000759	5	1103913	A	G
id5001470	5	2548127	A	G
id5001756	5	3049761	A	G
id5002528	5	4800198	A	C
id5002987	5	5893014	A	G
id5003034	5	5926907	A	G
wd5000542	5	6526840	A	C
id5003785	5	7422512	A	G
id5004297	5	8396329	A	G
id5004668	5	9225565	A	G
id5004864	5	10771513	A	C
wd5001329	5	10816422	A	G
id5005080	5	11709537	A	G
id5005179	5	12275642	A	C
id5005396	5	13023997	A	T
id5005551	5	13734028	A	G
id5005872	5	14279732	A	T
id5006311	5	15731341	A	G
id5006470	5	16240399	A	C
id5006821	5	17065777	A	C
id5007536	5	18793895	A	G
id5007714	5	19066134	A	G
id5008572	5	20500597	A	G
id5009045	5	21502439	A	G
id5009997	5	22757622	A	G
id5010661	5	23708756	A	C
id5010992	5	24137673	A	C
id5012152	5	25742799	A	G
id5012480	5	26322232	A	G
id5013231	5	27370633	A	C
id5014338	5	28724102	A	G
id5014589	5	29079162	A	G
id6000402	6	645916	A	G
fd7	6	1764762	A	C
fd8	6	1767007	A	C
id6001397	6	1867223	A	G
id6001524	6	1974738	A	G
id6001535	6	2009738	A	C
fd13	6	3081327	A	G
id6003000	6	3792723	A	G
id6003318	6	4629104	A	T
id6003649	6	5680680	A	G
fd17	6	6751358	A	G
id6004343	6	6761727	C	G
id6004481	6	7002214	A	G
id6005350	6	8243695	A	G
id6005661	6	8823428	A	G
id6006147	6	9683815	A	T
id6007312	6	11760014	A	G
id6007495	6	12259075	A	T
ud6000572	6	13041848	A	G
id6008704	6	14572993	A	G
id6008973	6	15426705	C	G
id6009055	6	16415144	A	G
id6009447	6	17491856	C	G
id6009683	6	18010007	A	C
id6010185	6	19978461	A	G
id6010434	6	20538708	A	G
id6010766	6	21508628	A	T
id6011018	6	21827925	A	G
id6011429	6	22829276	A	G
id6012064	6	24170016	A	C
id6012426	6	24793979	A	T
id6013446	6	25910085	A	C
id6013529	6	26025122	A	G
id6014475	6	27191592	C	G
id6015793	6	28504617	A	C
id6016400	6	29726171	A	G
id6016490	6	30085266	A	C
id6016941	6	31686494	A	G
id7000157	7	857039	A	T
ud7000066	7	1091858	A	G
id7000461	7	2672850	A	G
id7000519	7	3682343	A	C
wd7000465	7	4800131	A	G
id7000871	7	5753589	A	G
id7000988	7	6005869	A	T
id7001156	7	7021416	A	C
id7001478	7	8173010	A	G
id7001628	7	9004374	A	G
id7001912	7	10844555	A	G
wd7001471	7	11397391	C	G
id7002051	7	12234705	A	C
id7002105	7	13428582	A	G
id7002260	7	14436313	A	G
id7002427	7	15870899	A	C
id7002690	7	17529692	A	G
id7002784	7	18481349	A	G
id7002859	7	19163804	A	G
id7003072	7	20321276	A	T
id7003359	7	21795162	A	G
id7003748	7	22937302	A	G
id7003853	7	23253371	A	G
id7004429	7	24973974	A	C
id7004442	7	25012069	A	T
id7004870	7	26392335	A	G
id7005137	7	27136695	A	G
id7005333	7	27648526	A	T
id7005665	7	28909948	A	G
id8000240	8	657032	A	C
id8000699	8	2207788	C	G
id8001223	8	3681009	A	G
id8001477	8	4556655	A	C
id8001908	8	5633803	A	G
id8002194	8	6239590	A	G
id8002314	8	7548604	A	C
id8002662	8	8677602	A	G
id8003141	8	9824353	A	C
id8003309	8	10357488	A	G
wd8001854	8	11695688	A	C
id8003681	8	12470925	A	G
id8003766	8	13481536	A	T
id8003838	8	14148422	A	G
id8004029	8	15074116	A	G
ud8001072	8	16643803	A	G
wd8003200	8	17267851	A	T
id8004838	8	18388475	A	T
id8005359	8	19921403	A	C
id8005525	8	20479641	A	G
id8005815	8	21181074	A	G
id8006485	8	22623643	A	T
id8006727	8	23641050	A	G
id8006789	8	24213404	A	G
wd8004122	8	25867807	A	T
id8007301	8	26843503	A	G
id8007472	8	27370650	A	C
id9000174	9	769604	A	G
id9000389	9	1274053	A	T
id9000661	9	2307157	A	G
id9000881	9	4227655	A	T
id9001297	9	5666376	C	G
id9001352	9	5871681	A	G
id9001614	9	6610029	A	G
id9002014	9	7548050	A	G
id9002497	9	8608930	A	G
id9002563	9	9278930	A	G
id9002721	9	10191767	A	G
id9003003	9	11422543	A	G
id9003188	9	12455478	A	G
id9003471	9	13204703	C	G
id9003720	9	14352065	A	G
id9004168	9	15542756	A	C
id9004727	9	16402294	A	C
id9005086	9	17134018	A	G
id9006356	9	18994582	A	G
id9006377	9	19020266	A	C
id9006988	9	20143516	A	G
id9007161	9	21486670	A	G
id9007356	9	22436047	A	G
id9007763	9	23361116	A	C
id10000174	10	857686	A	G
id10000644	10	2330587	A	T
id10001250	10	3999005	A	G
id10001624	10	5168850	A	G
wd10001251	10	6321508	A	G
id10002602	10	9547754	C	G
ud10000620	10	10245076	A	G
id10003050	10	11961180	A	T
id10003056	10	12044087	C	G
id10003555	10	13908739	A	G
id10003686	10	14444301	A	G
id10003885	10	15234210	A	G
id10005538	10	18906486	A	C
id10006161	10	19978883	A	C
id10006243	10	20073993	A	T
id10006726	10	21920278	A	G
id10006963	10	22497017	A	G
id10007301	10	23488619	A	G
id10007384	10	23649039	A	T
id11000133	11	681740	A	C
id11000515	11	1842426	A	T
id11000858	11	2726164	A	G
id11000980	11	3074100	A	T
id11001683	11	4232395	A	G
id11002519	11	5844897	A	G
id11002639	11	6052297	A	G
id11002933	11	7436906	A	C
id11003281	11	8603430	A	C
id11003556	11	9174218	A	G
id11003924	11	10786776	A	C
id11004215	11	11962160	A	G
id11004240	11	12028646	A	G
wd11001469	11	14891499	A	T
id11004398	11	15079795	A	G
id11004812	11	16561026	A	T
id11005065	11	17274318	A	G
id11005646	11	18431425	C	G
id11006398	11	20116566	A	C
id11007488	11	21864349	A	T
id11007840	11	22619825	A	G
id11008036	11	23288639	A	G
id11008862	11	24866248	A	C
id11008929	11	25015613	A	C
id11009201	11	25688680	A	T
id11009456	11	26265202	A	G
id11009687	11	26826111	A	G
id11010245	11	27873594	A	C
id11010335	11	28143109	A	G
id11010975	11	29440398	A	C
id11011505	11	30575776	A	T
id12000252	12	723922	A	T
id12000605	12	1320261	A	G
id12001224	12	2963765	A	G
id12001321	12	3208559	A	G
id12001996	12	4449205	A	C
id12002490	12	5711505	A	G
id12002728	12	6814455	A	G
id12003019	12	7604301	A	G
id12003803	12	9539229	A	G
id12004047	12	10468209	A	G
id12004491	12	12536471	A	G
id12005205	12	14637273	A	C
id12005501	12	15716998	C	G
id12005592	12	16014883	A	G
id12005823	12	17560239	A	G
id12006327	12	19025789	A	T
id12006560	12	19666867	A	G
id12006742	12	20681547	A	C
id12006801	12	21041644	A	G
id12007742	12	23086575	A	C
id12007988	12	23491419	A	G
id12008557	12	24291918	A	G
id12009089	12	25364739	A	G
id12009128	12	25503627	A	G
id12009407	12	26057332	A	G
id12010050	12	27569791	A	C
